# Supplementary material
Source: PubMed Central journal article supplement (PMC3497370)
Supplement: AEM.02130-12_zam999103896so1.pdf [file AEM.02130-12_zam999103896so1.pdf]

## Supplemental Materials

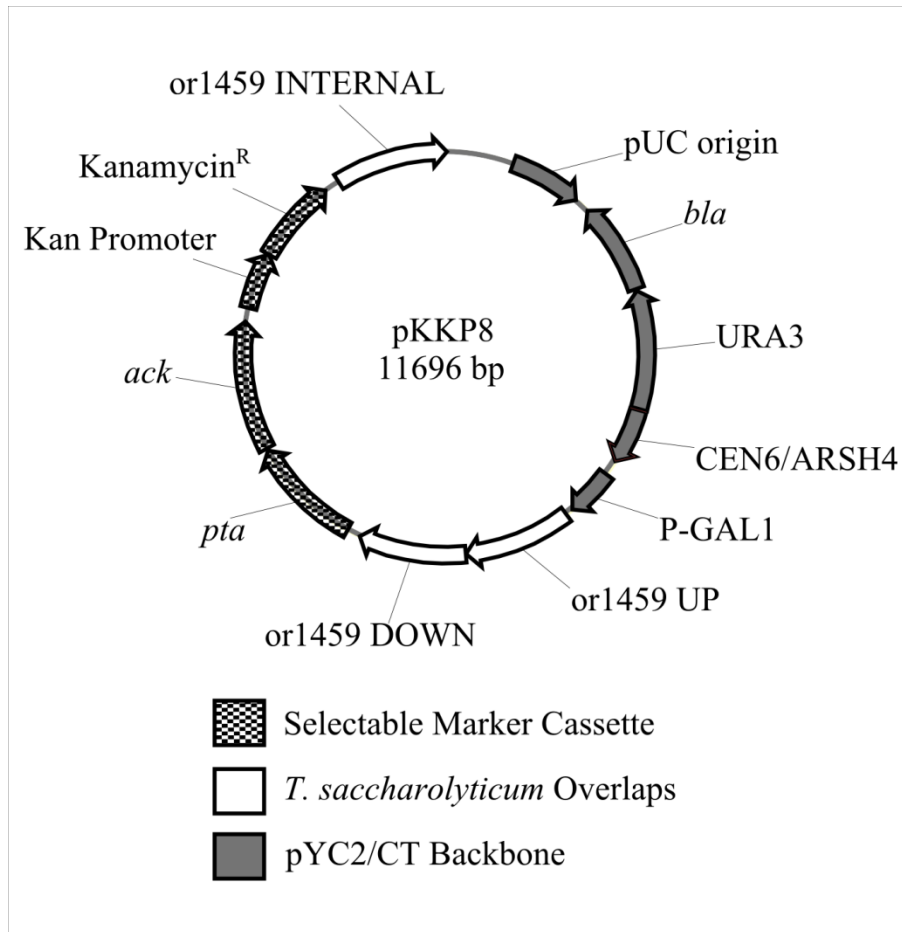

**Figure S1: Map of plasmid used to delete *xynA* (*or1459*).** Sections in white represent the regions of homology with *T. saccharolyticum*. Checkered sections indicate the selectable marker cassette, featuring both positive (kanamycin resistance) and negative (*pta-ack*) selectable markers. Grey regions indicate the pYC2/CT backbone. Similar vectors were constructed for each deletion strain using primers listed in Table 1.

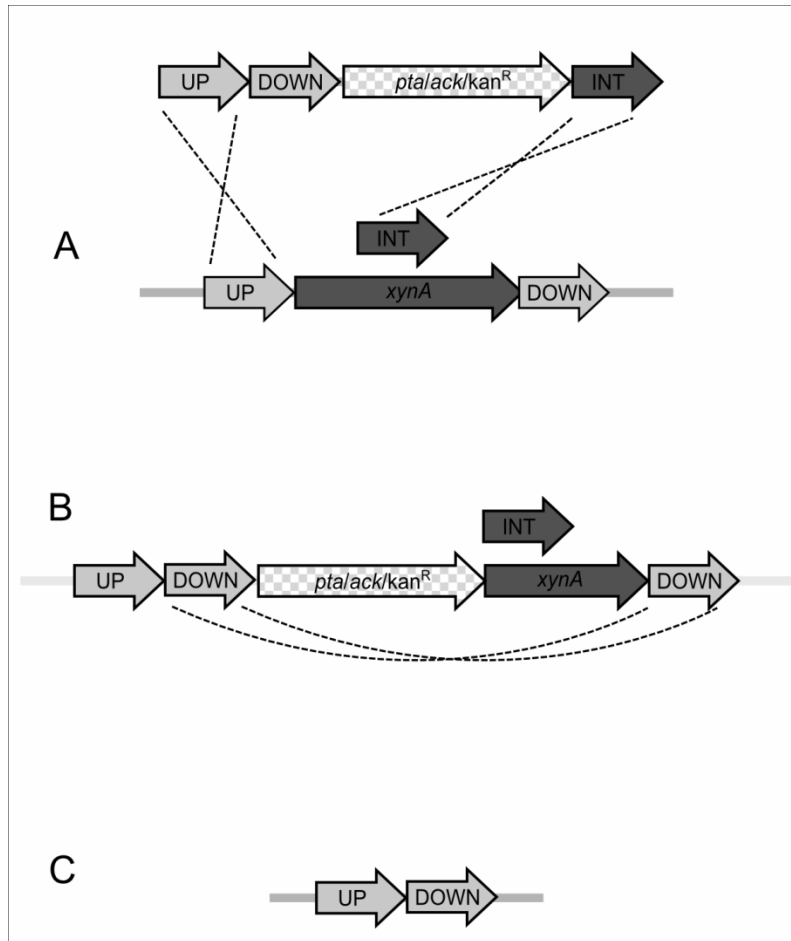

**Figure S2: Transformation schematic for markerless deletions.** A) Plating on kanamycin in the presence of the linear construct selects for vector recombination at the upstream and internal regions, removing a portion of the *xynA* gene and replacing it with *pta-ack-kan*. B) Growth in the presence of chloroacetate selects for strains that have lost *pta-ack* via a third recombination event between the repeated downstream regions, resulting in C) a markerless deletion of *xynA*.

**Table S1: Annotation of open reading frames deleted in *T. saccharolyticum* M0355 background.**

| Target | Description                                   | Source                                             |
|--------|-----------------------------------------------|----------------------------------------------------|
| or0897 | Putative endoxylanase ( <i>xynC</i> )         | This work                                          |
| or0271 | Putative glucokinase                          | C. Herring, Mascoma annotation, GenBank # CP003184 |
| or0272 | Putative ABC transporter                      | C. Herring, Mascoma annotation, GenBank # CP003184 |
| or0273 | Putative monosaccharaide-transporting ATPase  | C. Herring, Mascoma annotation, GenBank # CP003184 |
| or0274 | Putative D-xylose ABC transporter             | C. Herring, Mascoma annotation, GenBank # CP003184 |
| or0275 | Putative D-xylose ABC transporter             | C. Herring, Mascoma annotation, GenBank # CP003184 |
| or0276 | Putative xylulokinase                         | C. Herring, Mascoma annotation, GenBank # CP003184 |
| or0277 | Xylose isomerase                              | Liu et al 1996                                     |
| or1451 | Putative beta-xylosidase ( <i>xyID</i> )      | This work                                          |
| or1452 | Beta-xylosidase ( <i>xyIB</i> )               | Lorenz and Wiegel 1997                             |
| or1453 | Acetyl transferase                            | Lorenz and Wiegel 1997                             |
| or1456 | Putative extracellular solute binding protein | C. Herring, Mascoma annotation, GenBank # CP003184 |
| or1457 | Putative ABC transporter                      | C. Herring, Mascoma annotation, GenBank # CP003184 |
| or1458 | Putative ABC transporter                      | C. Herring, Mascoma annotation, GenBank # CP003184 |
| or1459 | Endoxylanase ( <i>xynA</i> )                  | Shao et al 1995, Liu et al 1996                    |
